# Supplementary material for: Boolean implication analysis unveils candidate universal relationships in microbiome data
Source: BMC Bioinformatics. 2021 Feb 5;22:49. doi: 10.1186/s12859-020-03941-4 (PMC7863539; doi:10.1186/s12859-020-03941-4)
Supplement: Supplementary file 1 — Additional file 1. List of QIITA study accession numbers used in the four different pooled datasets (main, validation datasets 1, 2 or 3). [file 12859_2020_3941_MOESM1_ESM.csv]

Study ID	Dataset
77	Main
94	Main
101	Main
103	Main
104	Main
107	Main
213	Main
214	Main
231	Main
232	Main
314	2
316	2
317	2
349	2
353	2
375	Main
386	2
391	2
393	2
395	2
396	2
397	2
449	Main
450	2
451	2
452	2
454	2
455	2
456	2
457	2
458	2
459	2
460	2
461	2
486	2
492	2
494	2
495	2
524	2
550	Main
619	2
625	2
626	2
632	2
638	2
654	2
659	2
662	2
678	2
713	2
714	Main
721	2
722	2
723	2
737	Main
755	Main
776	2
797	Main
802	2
803	2
804	2
805	2
807	2
808	2
809	2
810	2
814	2
816	2
829	2
833	2
836	2
839	2
846	2
861	2
864	2
865	2
867	Main
889	2
894	Main
895	2
905	2
909	2
910	2
925	2
926	2
928	2
929	2
933	2
940	2
945	2
958	2
959	2
963	2
990	2
1001	1
1010	1
1011	1
1020	1
1024	1
1030	1
1031	1
1033	1
1034	1
1035	1
1036	1
1037	1
1038	1
1039	1
1041	1
1043	1
1056	1
1064	1
1070	1
1098	1
1189	3
1191	3
1192	3
1197	3
1198	3
1200	3
1222	3
1235	3
1240	3
1242	3
1288	Main
1289	3
1335	3
1345	3
1364	3
1437	3
1438	3
1448	3
1452	3
1453	3
1479	3
1481	3
1485	3
1487	3
1494	3
1517	3
1520	3
1521	3
1526	3
1530	3
1549	3
1552	3
1561	3
1564	3
1566	3
1578	3
1579	3
1580	3
1609	3
1618	3
1622	3
1627	3
1629	3
1632	3
1634	3
1642	3
1653	3
1665	3
1671	3
1673	3
1674	3
1683	3
1684	3
1689	3
1690	3
1692	3
1694	3
1696	3
1700	3
1702	3
1711	3
1713	3
1714	3
1715	3
1716	3
1717	3
1721	3
1728	3
1734	3
1736	3
1737	3
1740	Main
1741	3
1742	3
1747	3
1748	3
1772	3
1773	3
1774	3
1792	3
1795	3
1798	3
1799	3
1802	3
1818	3
1822	3
1841	Main
1845	3
1880	3
1883	Main
1884	3
1885	3
1919	3
1924	3
1927	Main
1928	Main
1934	3
1939	Main
1958	3
1976	3
1998	3
2010	Main
2014	Main
2019	2
2024	Main
2080	2
2086	Main
2104	Main
2105	2
2107	2
2136	2
2148	2
2149	2
2150	2
2151	2
2182	2
2192	Main
2202	2
2223	2
2229	Main
2259	2
2260	2
2278	2
2279	2
2300	2
2318	2
2338	2
2382	2
2401	2
2538	2
2639	2
10052	1
10057	1
10080	1
10082	1
10093	1
10105	1
10119	1
10124	1
10137	1
10142	1
10144	1
10145	1
10156	1
10169	Main
10171	1
10178	1
10180	1
10184	1
10196	1
10218	1
10245	1
10246	1
10248	1
10249	Main
10251	1
10257	1
10272	1
10273	1
10278	1
10280	1
10281	Main
10283	1
10291	1
10293	1
10296	1
10297	1
10300	1
10311	1
10313	1
10315	1
10321	1
10323	1
10324	1
10342	Main
10343	Main
10352	Main
10353	1
10360	Main
10363	1
10369	1
10370	1
10376	1
10378	1
10395	1
10401	1
10403	1
10407	1
10422	1
10423	Main
10431	1
10442	1
10461	1
10463	1
10464	1
10469	1
10470	1
10481	1
10483	1
10485	Main
10496	1
10502	1
10508	1
10511	1
10512	1
10522	1
10527	1
10530	1
10532	1
10541	1
10546	1
10557	1
10560	1
10561	1
10563	1
10565	1
10567	1
10581	1
10582	1
10585	1
10689	1
10706	1
10724	1
10729	Main
10764	1
10767	1
10778	1
10781	1
10786	1
10793	1
10794	1
10798	1
10801	Main
10805	1
10812	1
10815	1
10822	1
10823	1
10856	1
10863	1
10895	Main
10898	1
10902	1
10904	1
10911	Main
10916	1
10917	1
10918	1
10928	1
10934	1
10936	1
10937	1
10955	1
11043	3
11052	3
11076	3
11110	3
11113	3
11116	3
11128	3
11129	3
11149	3
11154	3
11160	3
11161	3
11167	3
11212	3
11227	3
11232	3
11259	3
11261	3
11269	3
11284	3
11333	3
11335	3
11336	3
11349	3
11351	3
11358	3
11360	3
11369	3
11402	3
11405	3
11432	3
11444	3
11479	3
11484	3
11488	3
11507	3
11513	3
11546	3
11550	3
11566	3
11625	3
11635	3
11653	3
11669	3
11692	3
11710	3
11721	3
11724	3
11735	3
11740	3
11760	3
11809	3
11851	3
11888	3
11914	3
11920	3
11933	3
11937	3
11954	3
12024	3
12241	3
12448	3
12489	3
